# Supplementary material for: Functional genomic analysis identifies drug targetable pathways in invasive and metastatic cutaneous squamous cell carcinoma
Source: PubMed Central journal article supplement — Cold Spring Harb Mol Case Stud. 2020 Aug;6(4):a005439. doi: 10.1101/mcs.a005439 (PMC7476409; doi:10.1101/mcs.a005439), 2020-08
Supplement: supp_mcs.a005439_Supplemental_Table1.pdf [file supp_mcs.a005439_Supplemental_Table1.pdf]

| Patient 1                           | Patient 2                          | Patient 3                               |
|-------------------------------------|------------------------------------|-----------------------------------------|
| >90yo Male                          | 61yo Male                          | 68yo Male                               |
| Left Parotid Gland cSCC             | Metastatic Right Neck cSCC         | Left Ear cSCC                           |
| Moderately Diff. (G2)               | Poorly Diff. (G3)                  | Moderate to Poorly Diff. (G2/G3)        |
| Perineural Inv: Negative            | Perineural Inv: Positive           | Perineural Inv: Positive                |
| Angiolymphatic Inv: Negative        | Angiolymphatic Inv: Positive       | Angiolymphatic Inv: Negative            |
| HPV: Negative                       | HPV: Negative                      | HPV: Positive                           |
| Tobacco: Former use (20 pack years) | Tobacco: No                        | Tobacco: Yes (45 pack years)            |
| Alcohol: No                         | Alcohol: No                        | Alcohol: Yes                            |
| Prior Tx: None                      | Prior Tx: Radiation                | Prior Tx: None                          |
| Tx: Surveillance                    | Tx: Chemotherapy + Radiation       | Tx: Surveillance (declined XRT)         |
| Recurrence: No                      | Recurrence: No                     | Recurrence: Lung met. & oral cavity SCC |
| Deceased: Yes                       | Deceased: Yes                      | Deceased: No                            |
| Survival (from surgery): 3.5 years  | Survival (from surgery): 10 months | Survival (from surgery): >2.5 years     |
